# Supplementary material for: Time-dependent solid-state molecular motion and colour tuning of host-guest systems by organic solvents
Source: PubMed Central journal article supplement (PMC6946670; doi:10.1038/s41467-019-13844-5), 2020-01-07
Supplement: 41467_2019_13844_MOESM3_ESM.pdf [file 41467_2019_13844_MOESM3_ESM.pdf]

## **Description of Additional Supplementary Files**

File Name: Supplementary Movie 1

Description: Gram scale preparation of the co-crystalline material  $C\alpha$ .

File Name: Supplementary Movie 2

Description: Transformation of  $C\alpha$  into  $M\beta$  in the presence of THF vapour.

File Name: Supplementary Movie 3

Description: Transformation from pattern A0 to pattern A by adding fluorescent blocks or changing the light source.

File Name: Supplementary Movie 4

Description: Transformation from pattern A to pattern C with the treatment of THF/CH<sub>3</sub>CN (1/1, v/v) vapour
